# Supplementary material
Source: publisher site journal article supplement (https://www.dovepress.com/get_supplementary_file.php?f=390794.xlsx)
Supplement: Supplementary file 1 [file get_supplementary_file.php]

## Sheet: Sheet1
Group	Pre-test	Post-test	Post-test2	Gender	GPA	Post-Pre Test	Post2-Post Test
Traditional	10	14	11	Male	1.89	4	-3
Traditional	8	7	8	Male	2.41	-1	1
Traditional	6	13	8	Male	2.59	7	-5
Traditional	10	12	9	Male	2.17	2	-3
Traditional	8	10	10	Male	2.38	2	0
Traditional	6	10	13	Male	2.54	4	3
Traditional	12	18	13	Male	4.59	6	-5
Traditional	8	13	15	Male	2.94	5	2
Traditional	8	18	19	Male	4.68	10	1
Traditional	9	14	16	Male	3.94	5	2
Traditional	6	17	19	Male	4.08	11	2
Traditional	8	16	9	Male	2.54	8	-7
Traditional	11	16	16	Male	2.77	5	0
Traditional	6	14	18	Male	3.09	8	4
Traditional	5	5	11	Male	2.66	0	6
Traditional	7	15	18	Male	3.07	8	3
Traditional	8	15	11	Female	3.68	7	-4
Traditional	7	18	9	Female	3.86	11	-9
Traditional	11	19	13	Female	4.56	8	-6
Traditional	4	18	8	Female	3.69	14	-10
Traditional	7	20	19	Female	4.73	13	-1
Traditional	6	20	14	Female	4.98	14	-6
Traditional	13	18	19	Female	4.53	5	1
Mobile	3	12	11	Male	2.1	9	-1
Mobile	5	5	4	Male	3.23	0	-1
Mobile	10	16	18	Male	2.65	6	2
Mobile	5	11	7	Male	2.85	6	-4
Mobile	5	14		Male	4.04	9
Mobile	8	15	12	Male	2.58	7	-3
Mobile	14	16	17	Male	3.28	2	1
Mobile	7	9	8	Male	2.76	2	-1
Mobile	4	16	15	Male	3.96	12	-1
Mobile	11	18	18	Male	4.42	7	0
Mobile	9	15	15	Male	4	6	0
Mobile	7	12	9	Female	3.02	5	-3
Mobile	11	15	10	Female	4.51	4	-5
Mobile	9	13	10	Female	4.96	4	-3
Mobile	8	6	11	Female	4.32	-2	5
Mobile	9	16	9	Female	4.5	7	-7
Mobile	8	14	11	Female	4.29	6	-3
Mobile	10	11	15	Female	4.36	1	4
Mobile	9	19	12	Female	4.24	10	-7
Mobile	9	15	11	Female	4.65	6	-4
Mobile	8	19	19	Female	4.58	11	0
Mobile	5	10	7	Female	3.83	5	-3
